# Supplementary material for: Spatio-temporal dynamics of multimodal EEG-fNIRS signals in the loss and recovery of consciousness under sedation using midazolam and propofol
Source: PubMed Central journal article supplement (PMC5679575; doi:10.1371/journal.pone.0187743), 2017-11-09

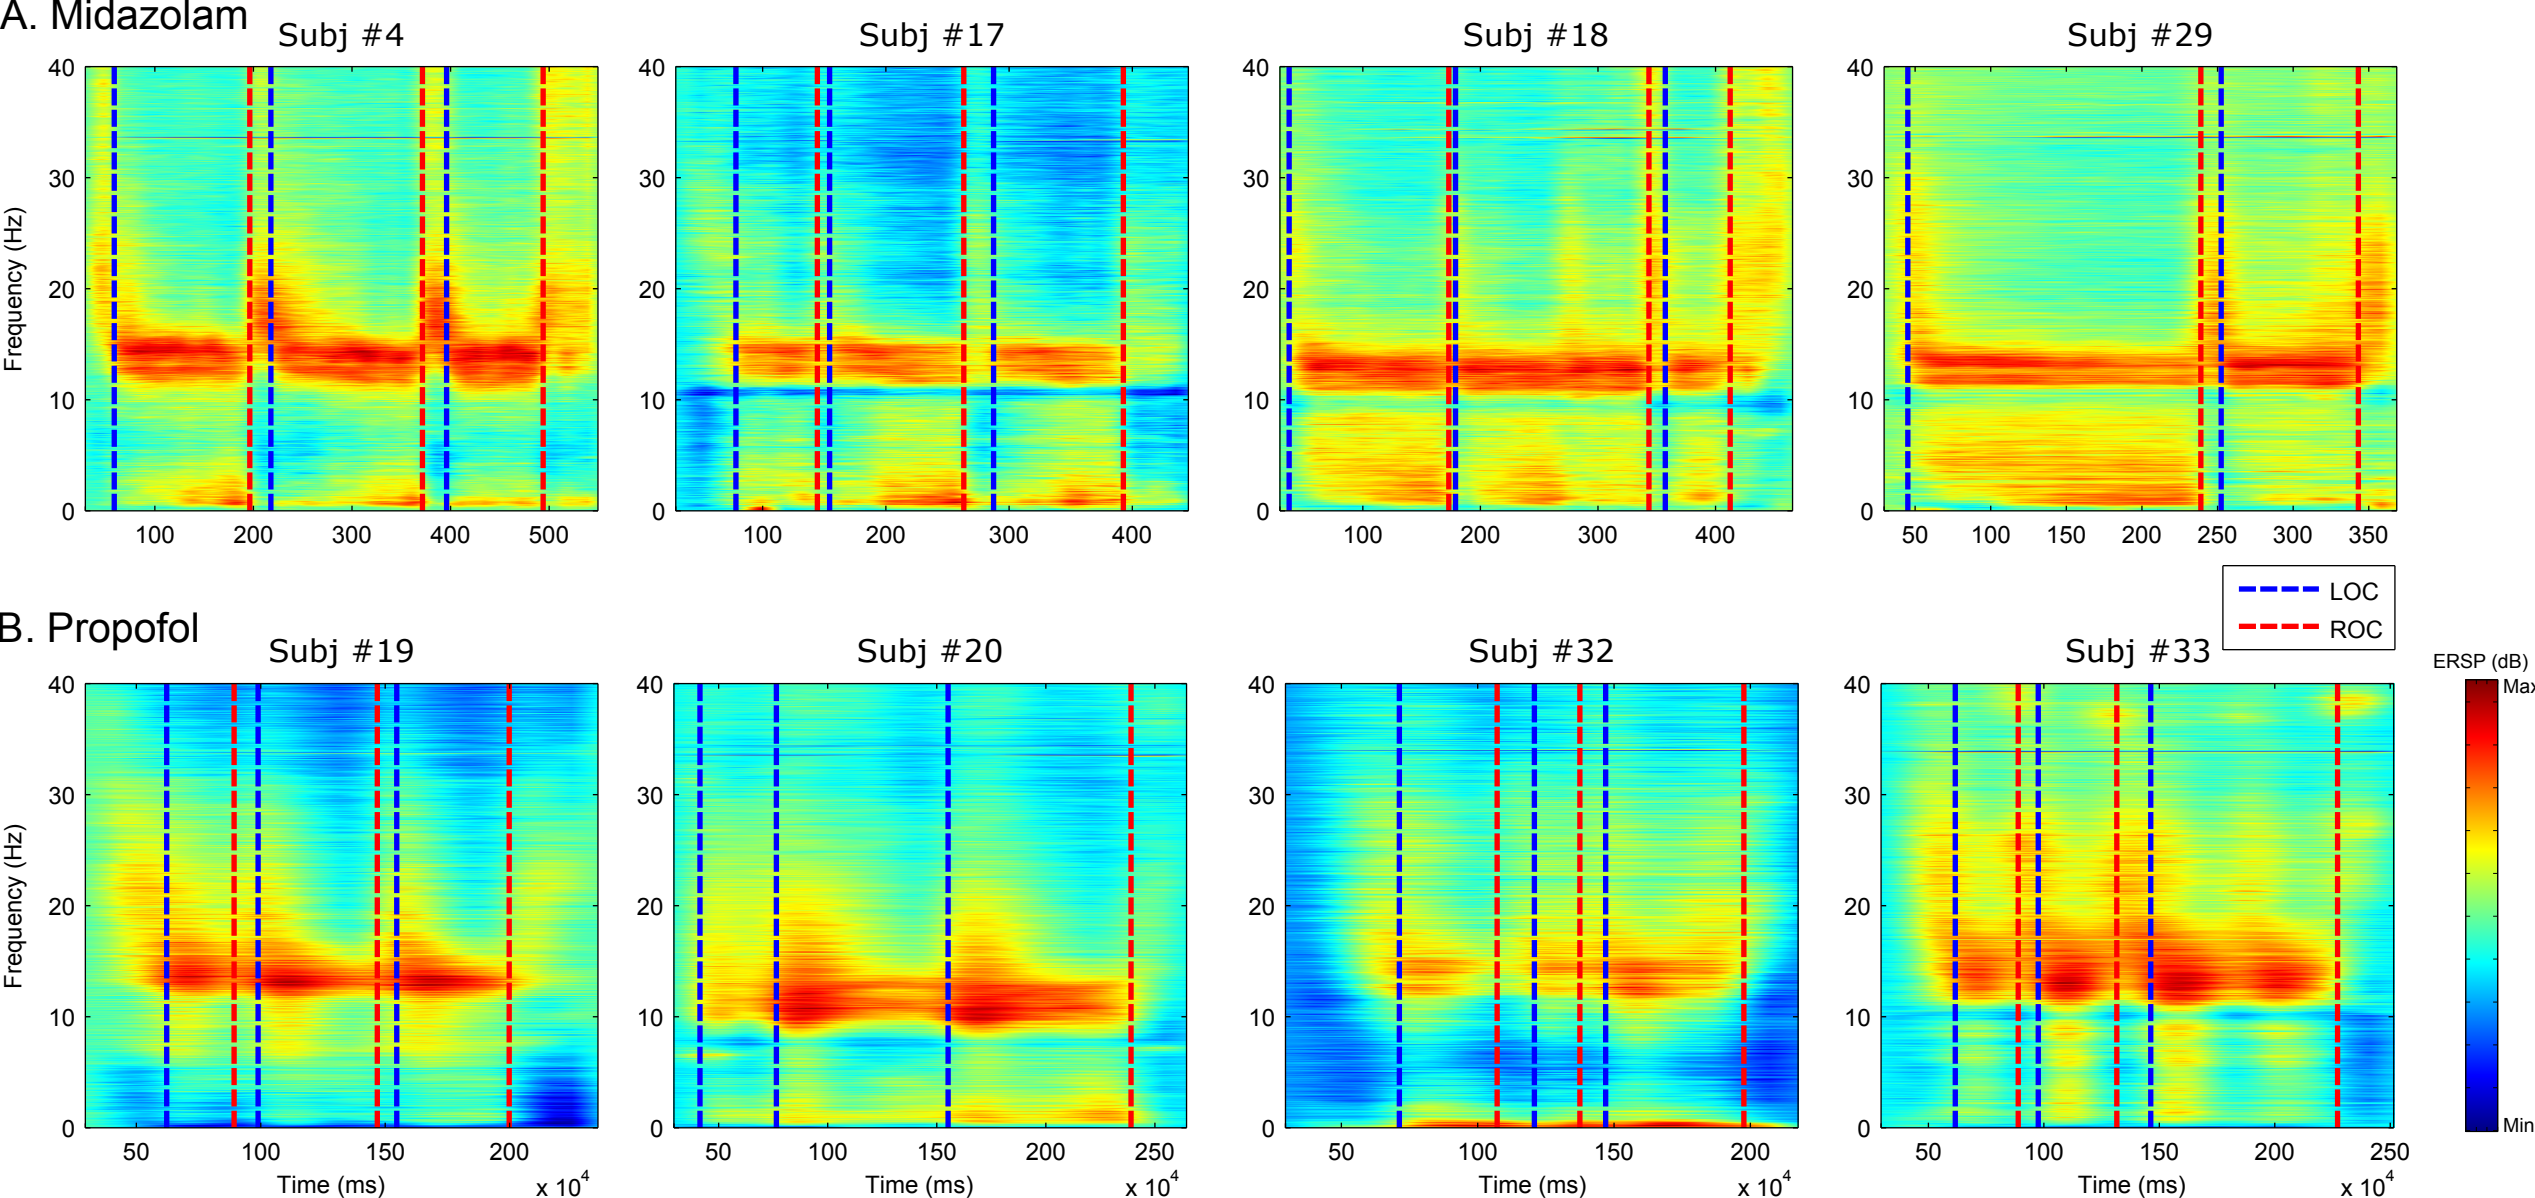

Supplement: pone.0187743.s001.pdf [file pone.0187743.s001.pdf]
